# Supplementary material for: Functional Diversity of the Litter-Associated Fungi from an Oxalate-Carbonate Pathway Ecosystem in Madagascar
Source: MDPI journal article supplement (doi:10.3390/microorganisms9050985), 2021-05-01

# Phylogenetic tree of the *Ceratobasidiaceae* (Basidiomycota) with *Trechispora* as outgroup

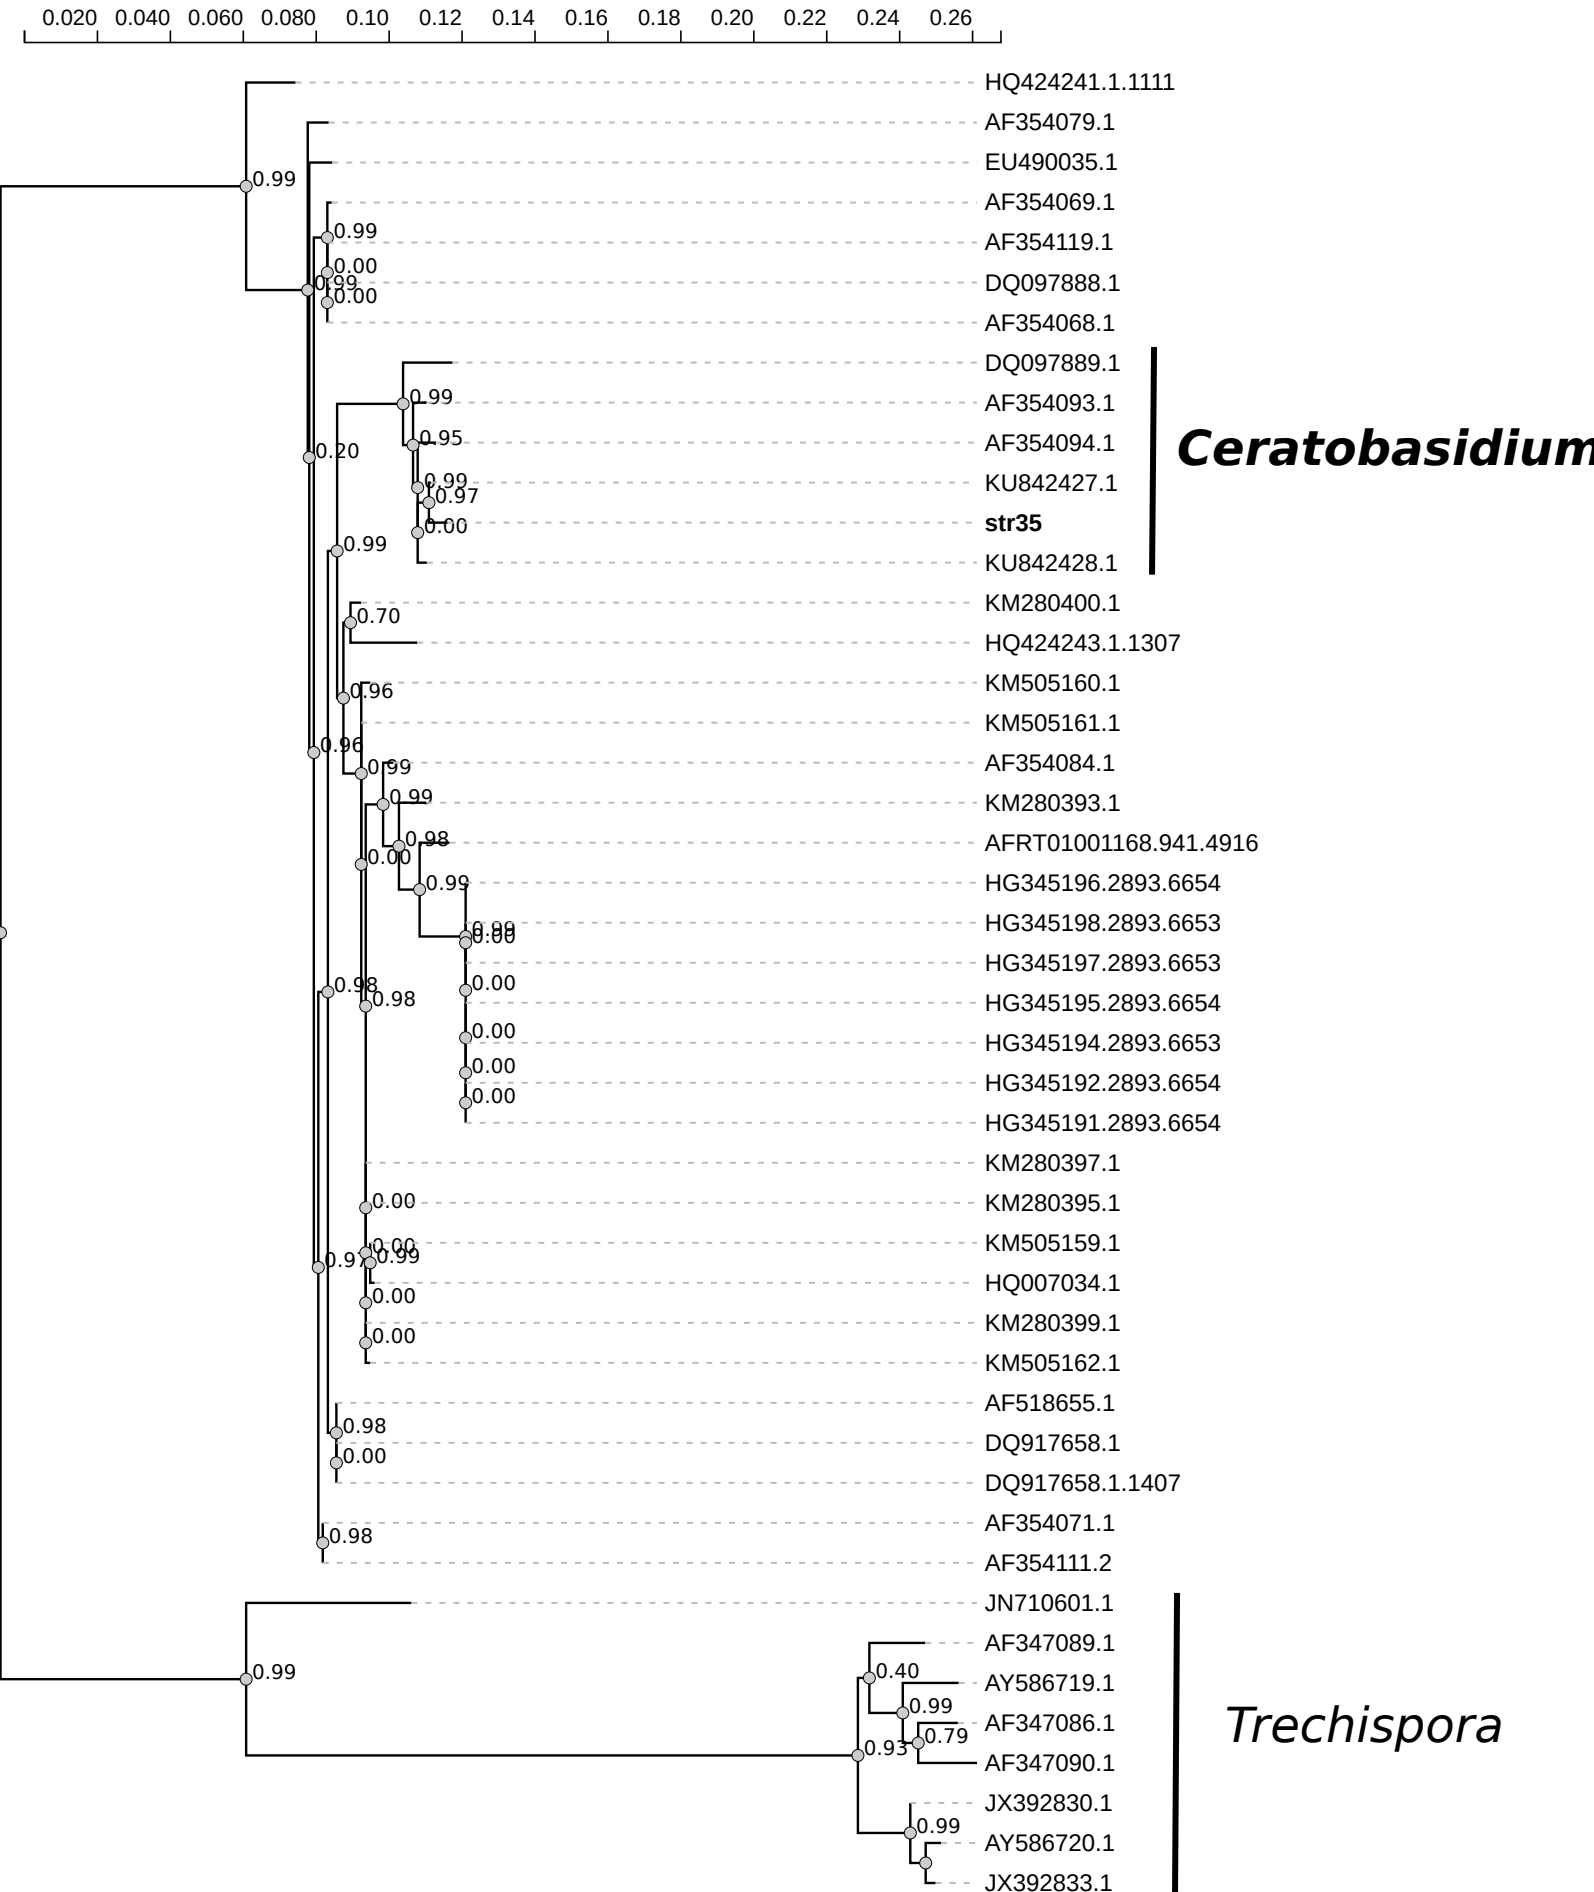

# Phylogenetic tree of the *Mucorales* (Mucoromycota) with *Umbelopsis* as outgroup

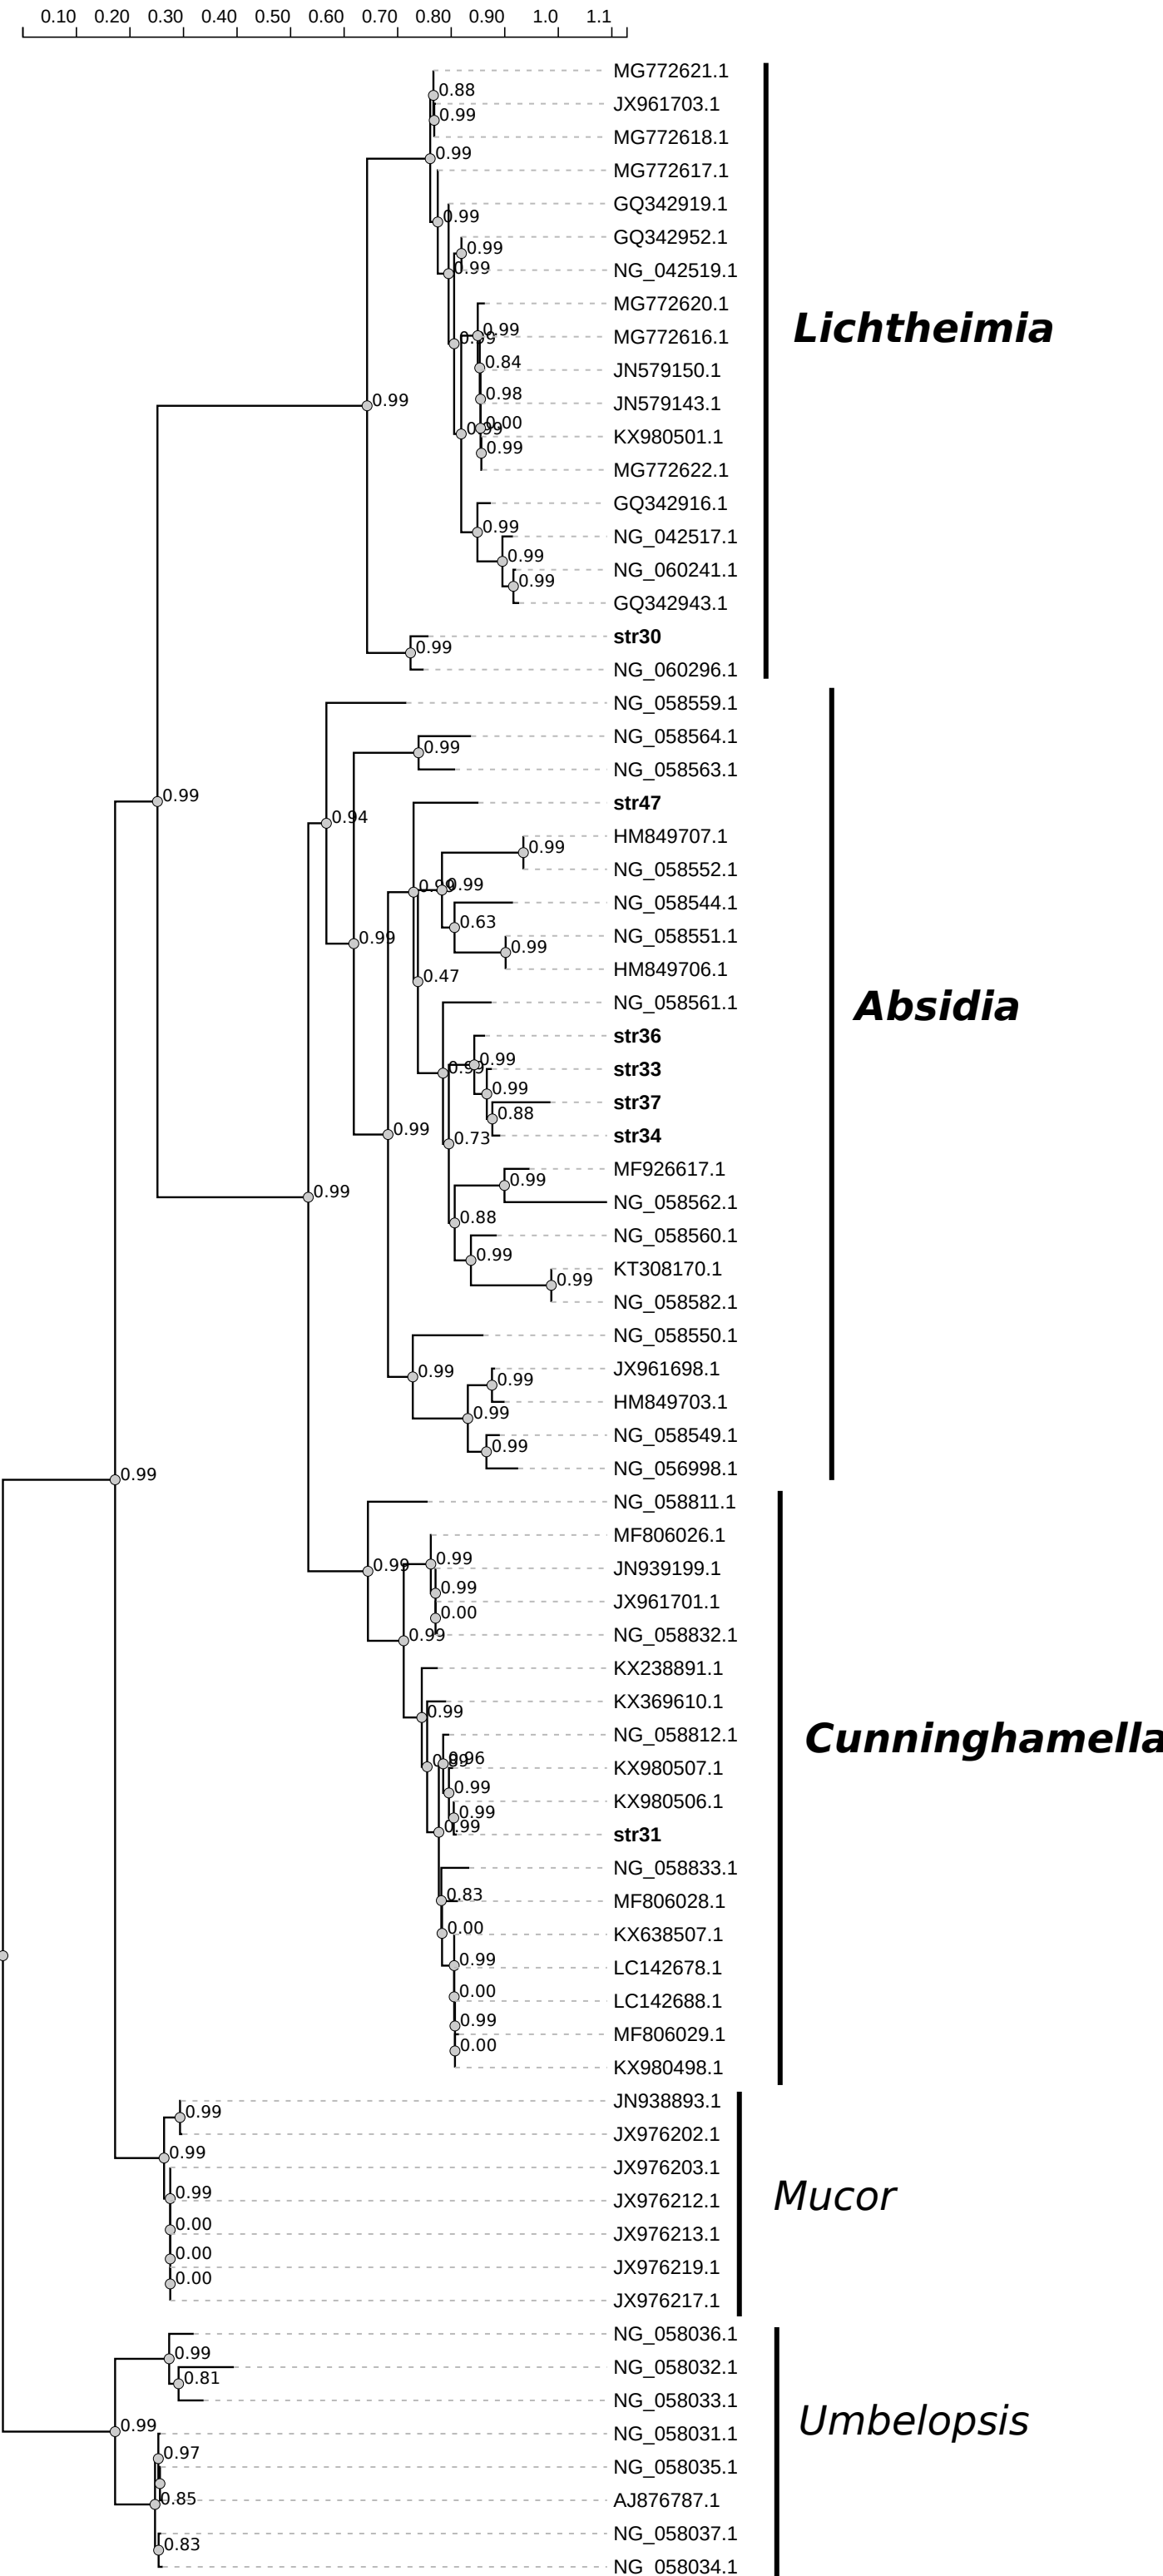

Phylogenetic tree of the *Dothideomycetes* (Ascomycota) with *Saccharomyces* as outgroup

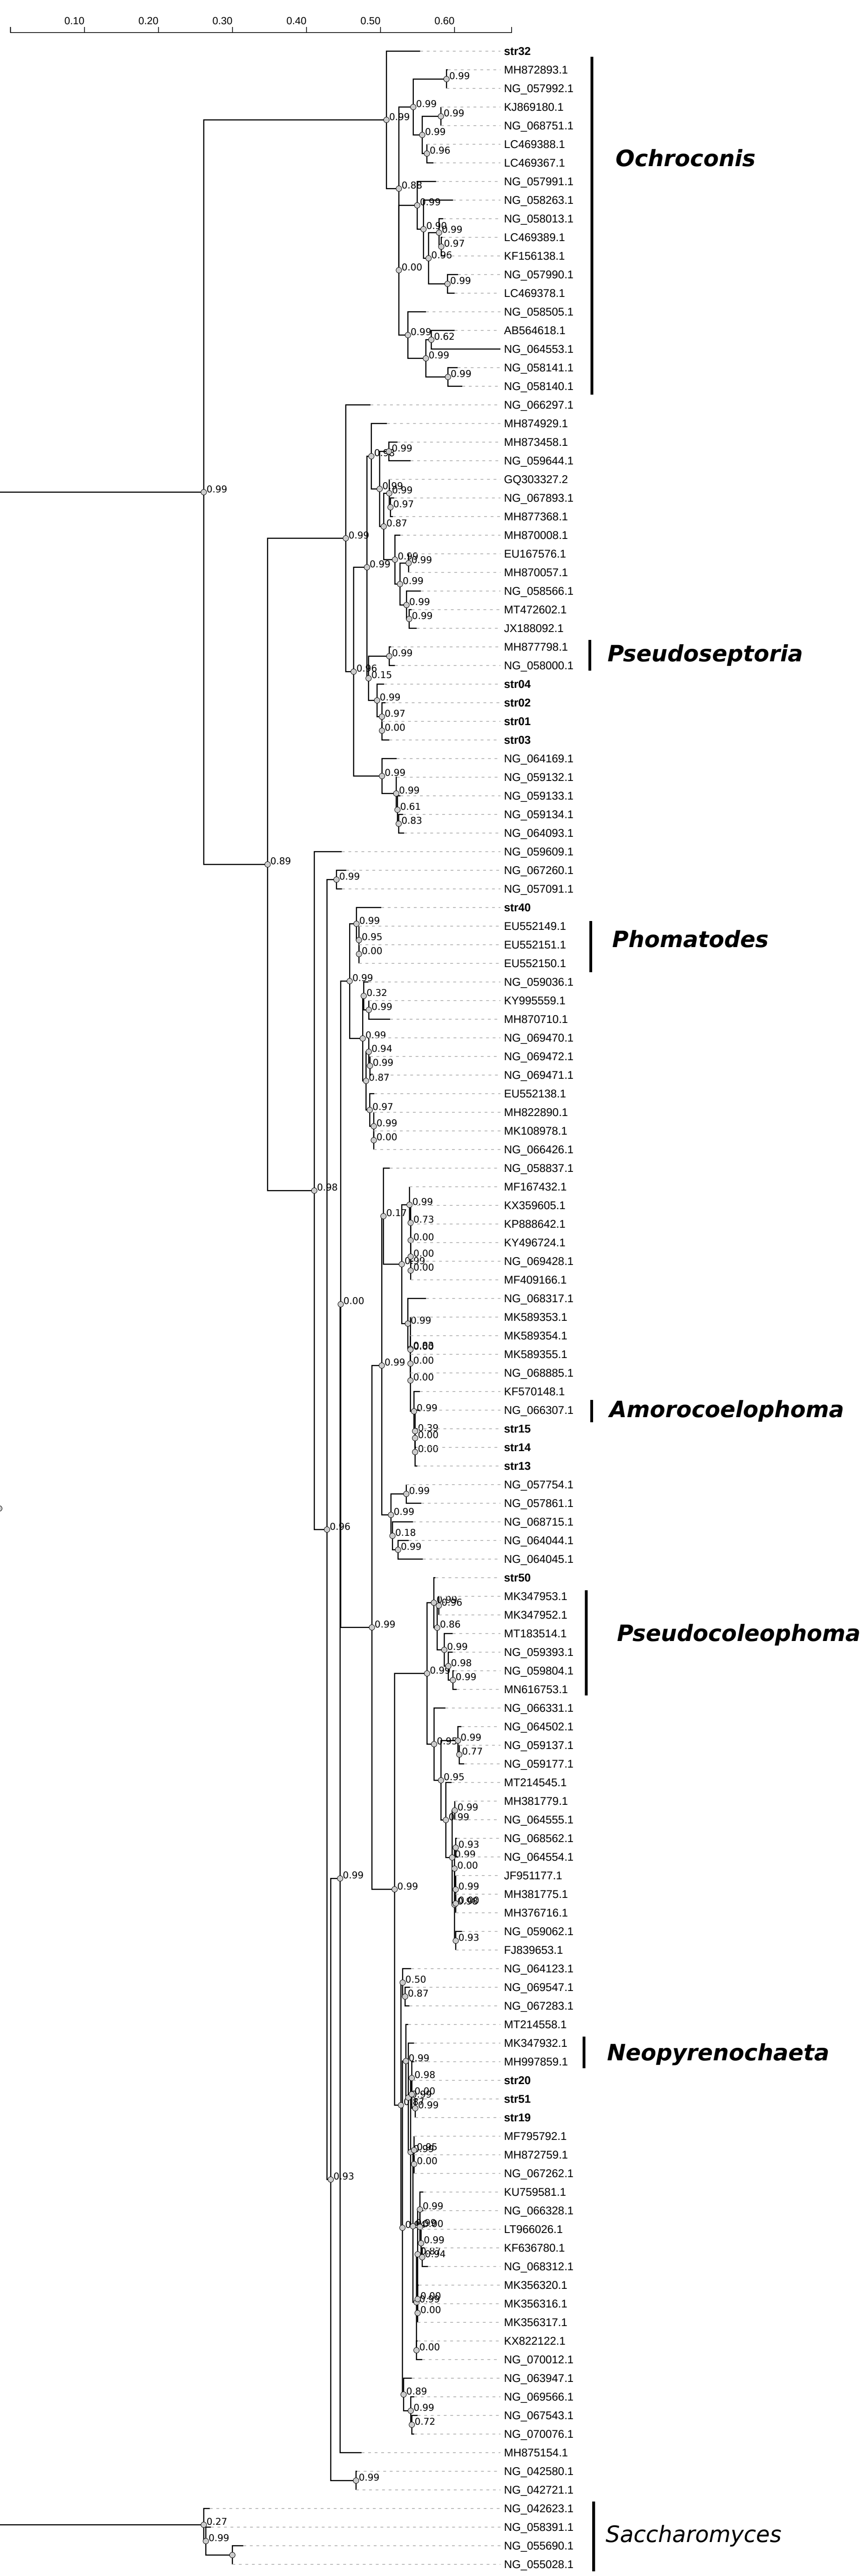

# Phylogenetic tree of the *Eurotiomycetes* (Ascomycota) with *Saccharomyces* as outgroup

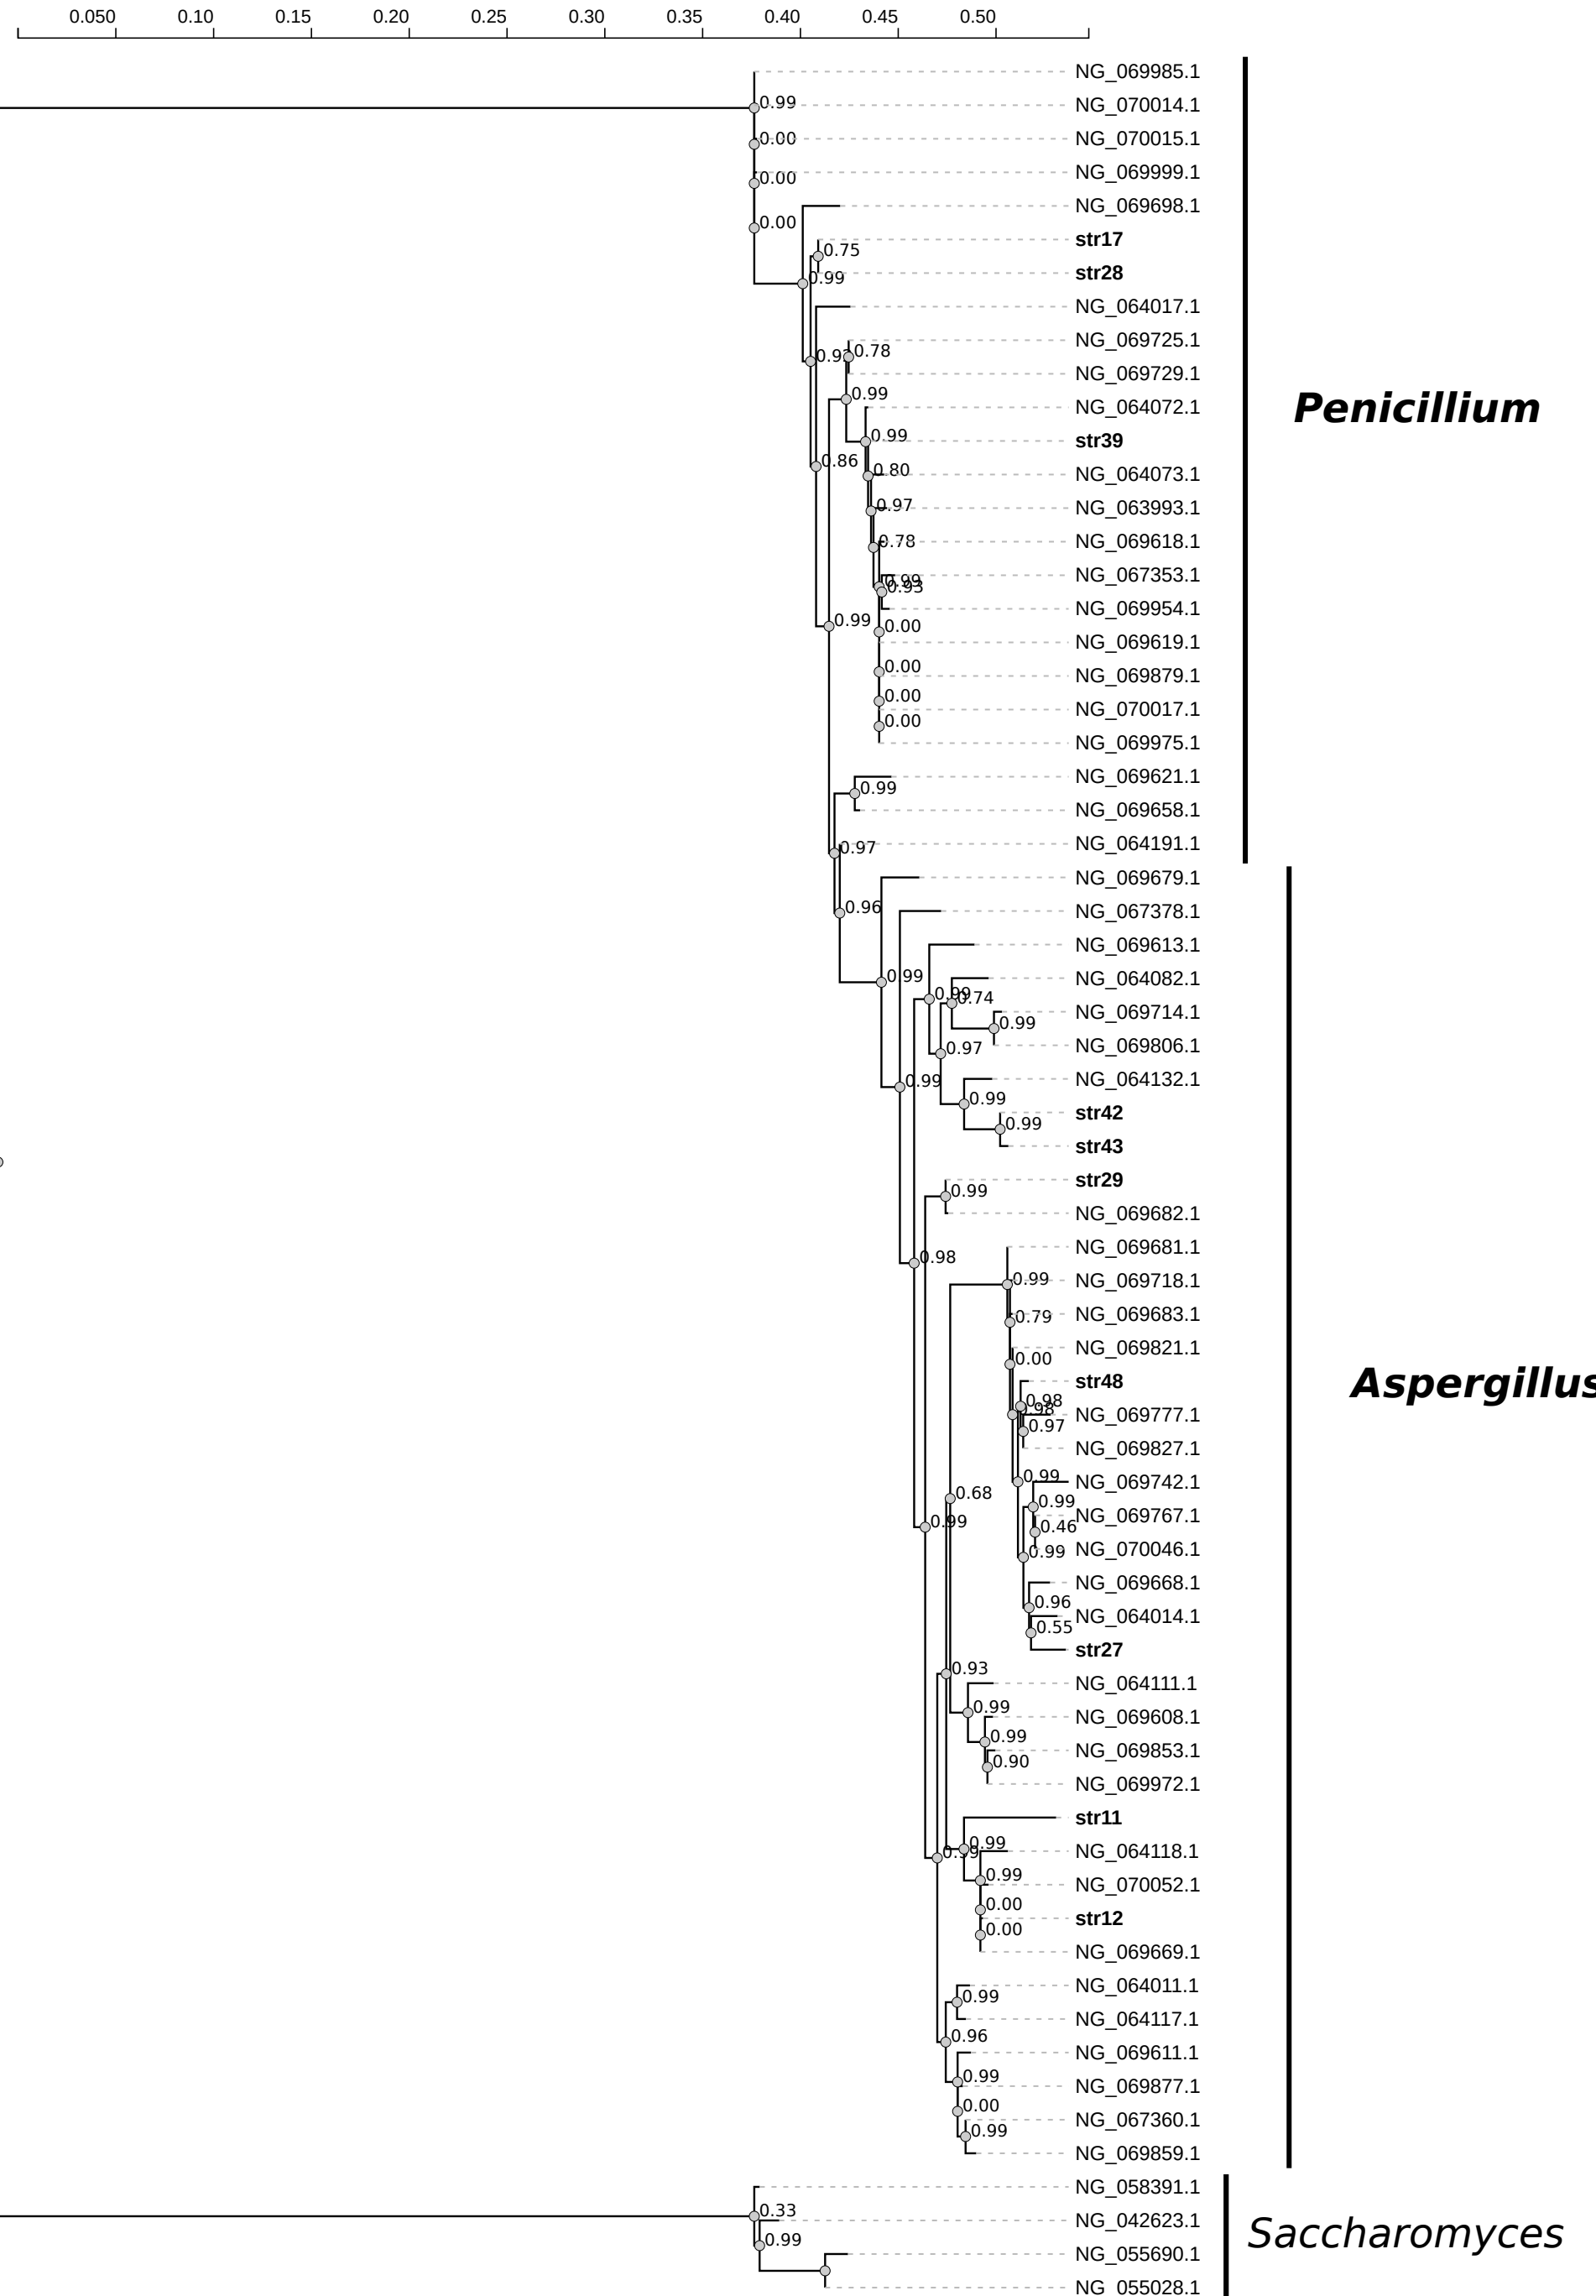

# Phylogenetic tree of the *Leotiomycetes* (Ascomycota) with *Saccharomyces* as outgroup

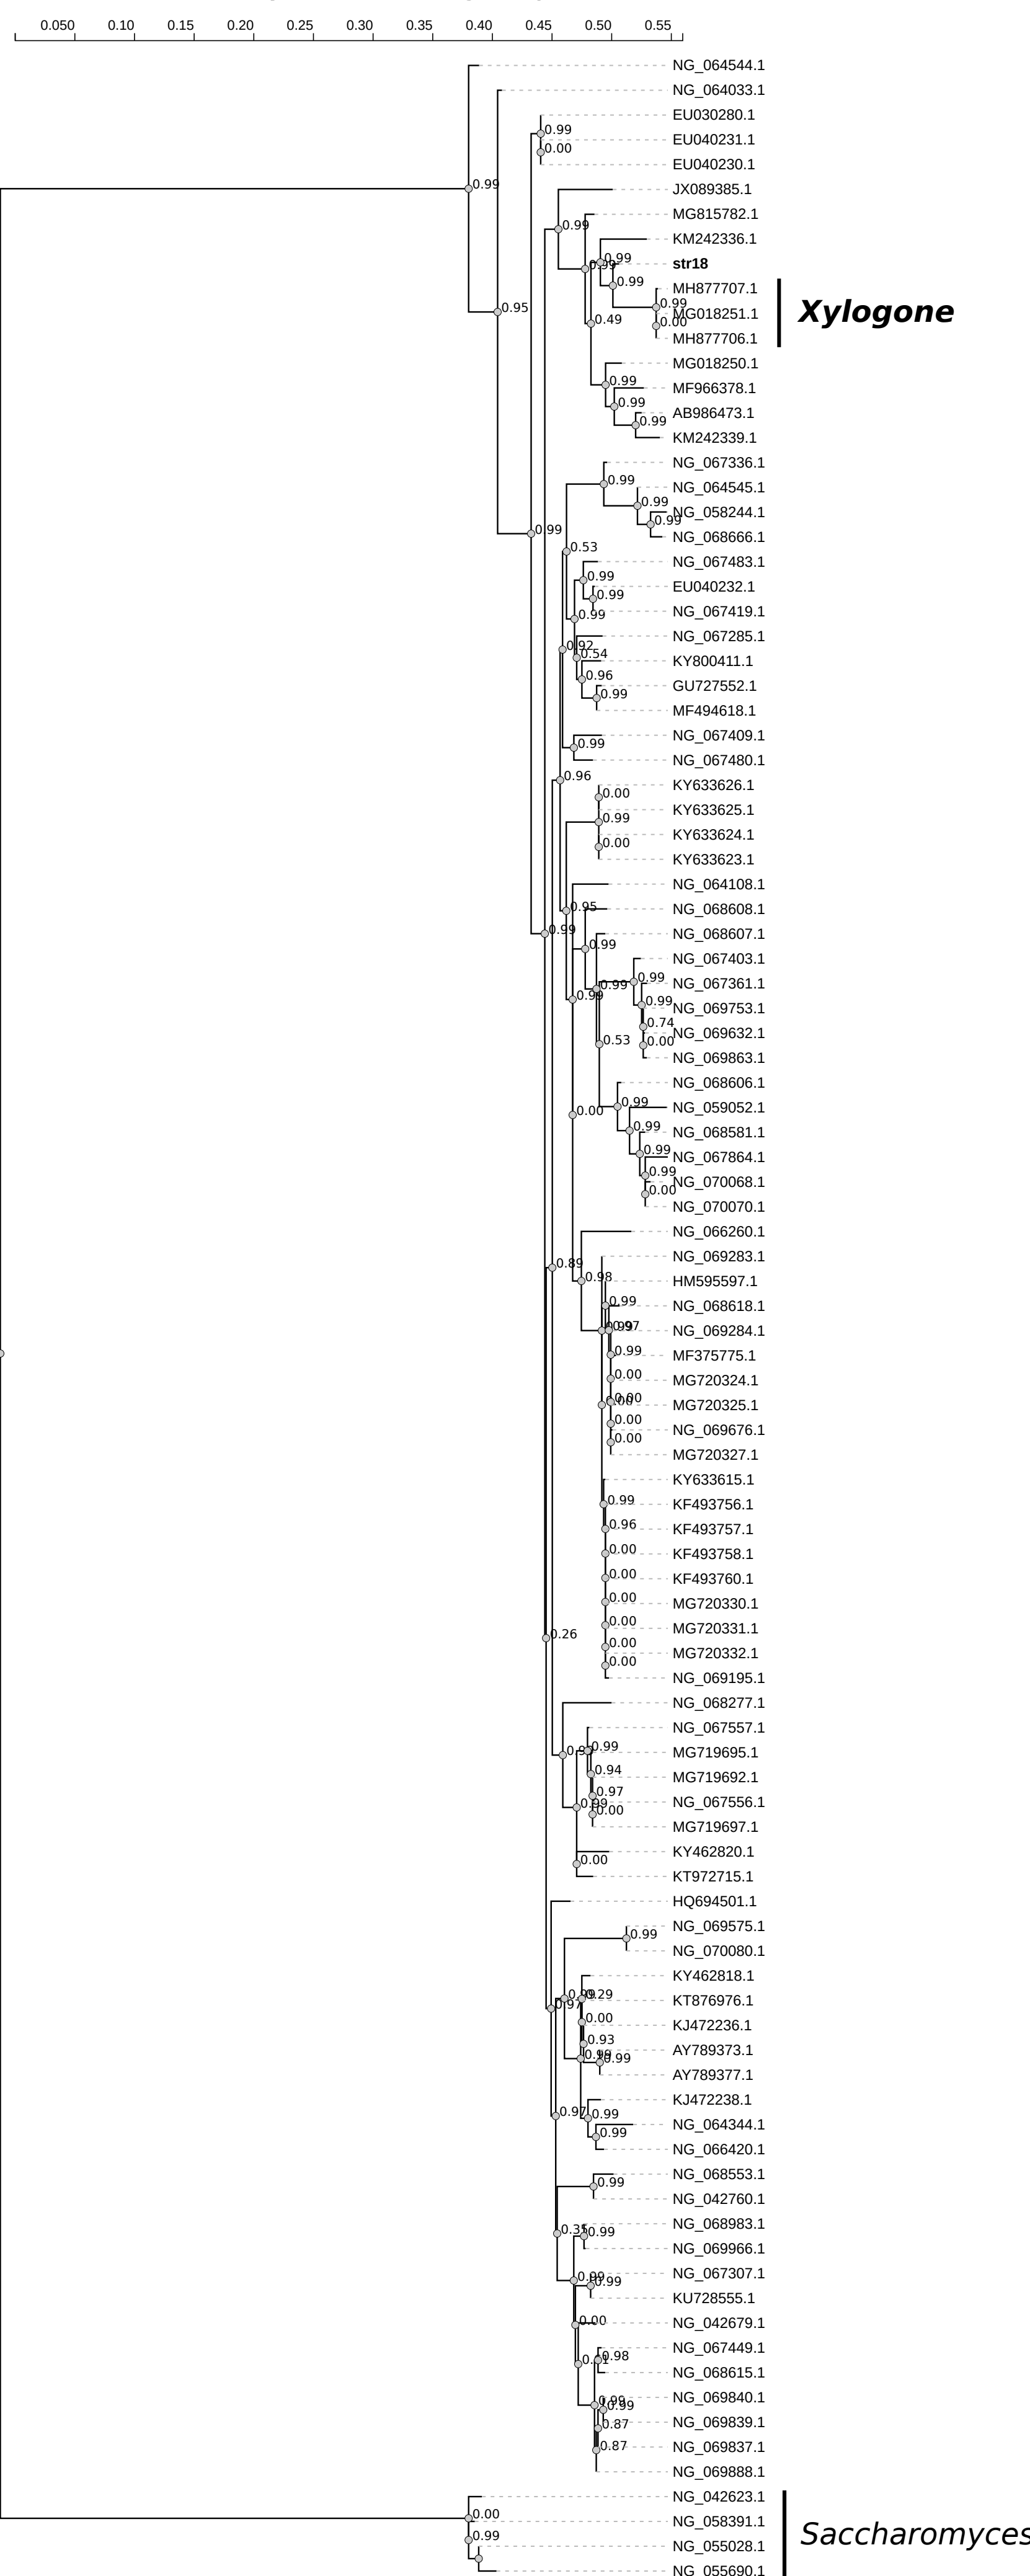

Phylogenetic tree of the *Sordariomycetes* (Ascomycota) with *Saccharomyces* as outgroup

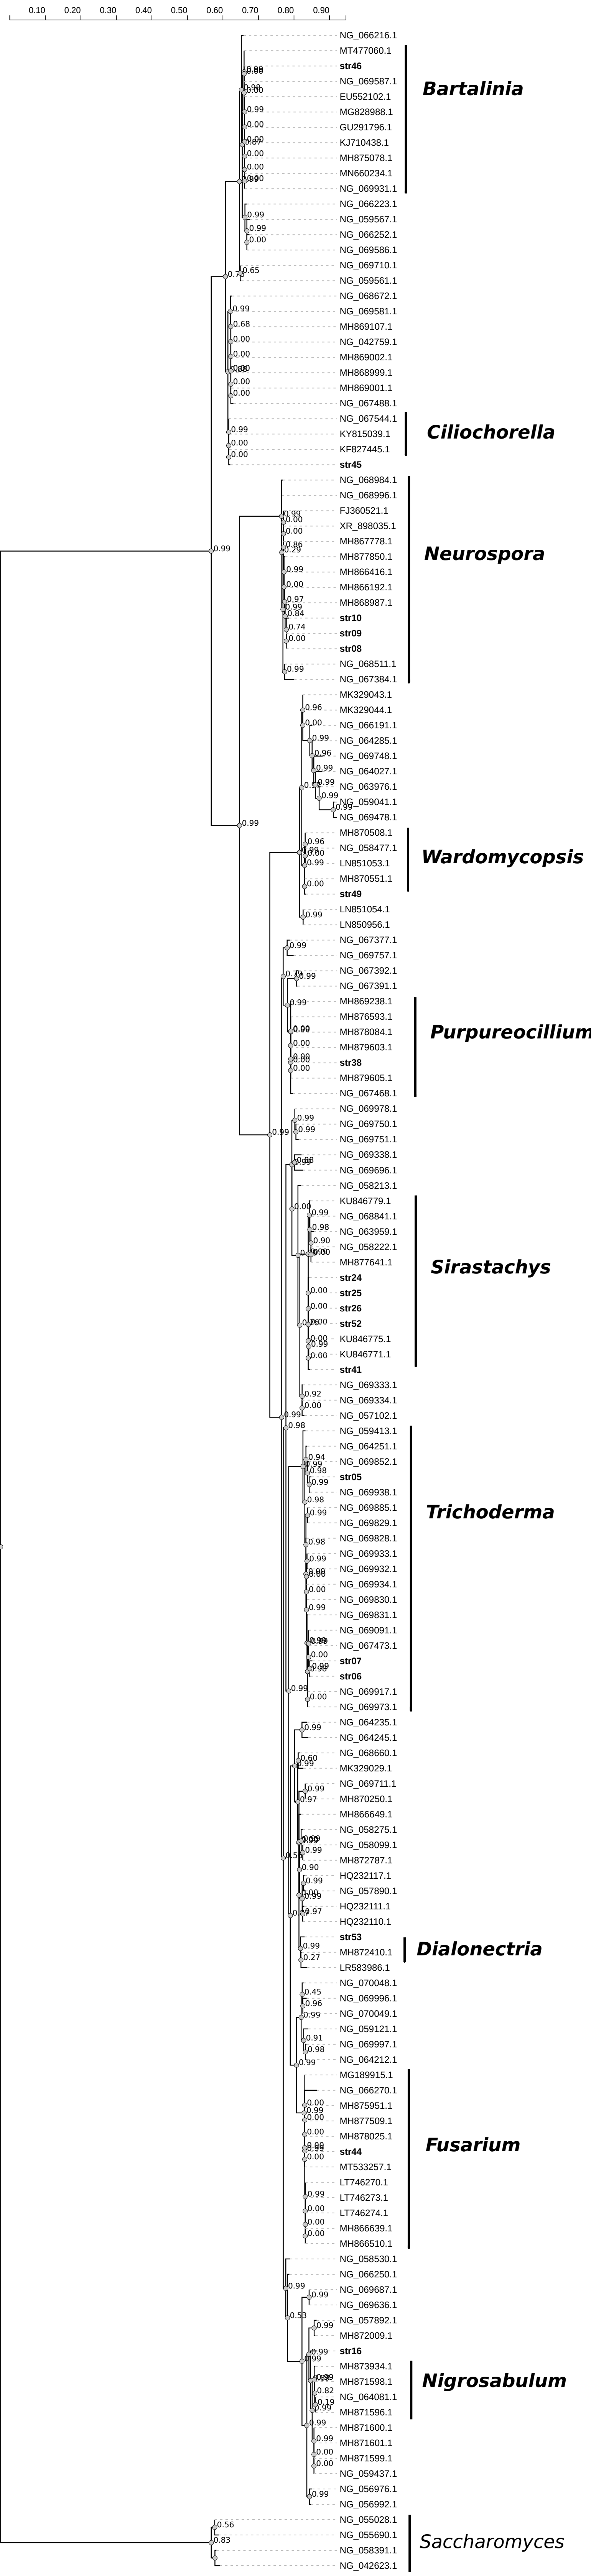

Supplement: s1 [file s1]
